# Supplementary material for: The curious case of opossum prion: a physicochemical study on copper(ii) binding to the bis-decarepeat fragment from the protein N-terminal domain
Source: Royal Society of Chemistry journal article supplement (doi:10.1039/c9dt02510c), 2019-01-01
Supplement: c9dt02510c1.pdf [file c9dt02510c1.pdf]

Electron Supplementary Information (ESI)

## The curious case of opossum prion: a physicochemical study on the copper (II) binding features of proteins N-terminal domain

Antonio Magri,<sup>a†</sup> Giovanni Tabbi,<sup>a†</sup> Lorena Maria Cucci,<sup>b</sup> Cristina Satriano,<sup>\*b</sup> Adriana Pietropaolo,<sup>c</sup> Gaetano Malgieri,<sup>d</sup> Carla Isernia<sup>d</sup> and Diego La Mendola <sup>\*e</sup>

<sup>a</sup> Institute of Crystallography-Catania, National Research Council (CNR), Via P. Gaifami 18, 95126 Catania, Italy.

<sup>b</sup> Department of Chemical Sciences, University of Catania, Viale A. Doria, 6, 95125, Catania, Italy.

<sup>c</sup> Department of Health Sciences, University of Catanzaro, Campus Universitario Viale Europa, 88100 Catanzaro, Italy

<sup>d</sup> Department of Environmental, Biological and Pharmaceutical Science and Technology, University of Campania "L. Vanvitelli", Via A. Vivaldi 43, 81100 Caserta, Italy.

<sup>e</sup> Department of Pharmacy, University of Pisa, Via Bonanno Pisano 6, 56126 Pisa, Italy.

† These authors contribute equally.

### Table of Contents

|                                                                                                                                                                                                                                               |     |
|-----------------------------------------------------------------------------------------------------------------------------------------------------------------------------------------------------------------------------------------------|-----|
| Table S1. Proton Chemical shift of the Op_bis-deca                                                                                                                                                                                            | p.2 |
| Figure S1. Far UV CD spectra of Cu-Op_bis-deca in H <sub>2</sub> O 2:1 metal to ligand molar ratio                                                                                                                                            | p.3 |
| Figure S2. Experimental (black) and simulated (red) EPR spectra of Cu(II)-Op_bis-deca                                                                                                                                                         | p.4 |
| Figure S3. Predicted UV spectrum at the PBE/6-31G* level of [CuLH <sub>2</sub> ] species formed by Op_bis-deca peptide.                                                                                                                       | P.5 |
| Figure S4. Comparison of EPR spectra of Cu(II)-Op_bis-deca peptide at Cu(II): L 1:1 molar ratio (black traces) with those obtained at Cu(II): L 2:1 molar ratio (blue traces), at different pH values. T= 150 K, [L]= 1 x 10 <sup>-3</sup> M. | p.6 |
| Table S2. Coordination parameters for Cu(II) coordinated to Op_bis-deca peptide                                                                                                                                                               | p.7 |
| Figure S5. Species distribution diagrams for Cu(II) complexes with L= Op_bis-deca and L'= Hu_bis-octa, 2:1 metal to ligand molar ratio                                                                                                        | p.8 |
| Figure S6. LSM images for the FRAP experiment                                                                                                                                                                                                 | p.9 |

**Table S1.** Proton Chemical shift of the Op\_bis-deca peptide in H<sub>2</sub>O, at pH 5.0.

| Amino acid        | NH   | $\alpha$ CH               | $\beta$ CH / $\gamma$ CH     | Others                                                                                                                      |
|-------------------|------|---------------------------|------------------------------|-----------------------------------------------------------------------------------------------------------------------------|
| Pro <sup>1</sup>  | ---  | 4.26                      | 2.14; 1.85; 1.71             | 2.01 Ac<br>3.51 $\delta\delta'$                                                                                             |
| His <sup>2</sup>  | 8.38 | 4.80                      | 2.99 $\beta$ ; 2.91 $\beta'$ | 8.29 H $\delta$ 2;<br>7.08 H $\epsilon$ 1                                                                                   |
| Pro <sup>3</sup>  | ---  | 4.26                      | 2.15; 1.86                   | 3.60 $\delta$ ; 3.42 $\delta'$                                                                                              |
| Gly <sup>4</sup>  | 8.44 | 3.90 $\alpha\alpha'$      |                              |                                                                                                                             |
| Gly <sup>5</sup>  | 8.18 | 3.94 $\alpha\alpha'$      |                              |                                                                                                                             |
| Ser <sup>6</sup>  | 8.24 | 4.34                      | 3.71 $\beta\beta'$           |                                                                                                                             |
| Asn <sup>7</sup>  | 8.36 | 4.62                      | 2.67; 2.60                   | 7.41 H $\delta$ 21; 6.77<br>H $\delta$ 22                                                                                   |
| Trp <sup>8</sup>  | 7.97 | 4.53                      | 3.18 $\beta\beta'$           | 7.14 H $\delta$ 1<br>10.05 H $\epsilon$ 1<br>7.39 H $\zeta$ 2<br>7.06 H $\eta$ 2<br>7.37 H $\zeta$ 3<br>7.48 H $\epsilon$ 3 |
| Gly <sup>9</sup>  | 8.09 | 3.70 $\alpha\alpha'$      |                              |                                                                                                                             |
| Gln <sup>10</sup> | 7.87 | 4.48                      | 2.25; 1.96; 1.81             | 7.42 H $\epsilon$ 21; 6.79<br>H $\epsilon$ 22                                                                               |
| Pro <sup>11</sup> | ---  | 4.26                      | 2.14; 1.85; 1.71             | 3.51 $\delta\delta'$                                                                                                        |
| His <sup>12</sup> | 8.38 | 4.80                      | 2.99 $\beta$ ; 2.91 $\beta'$ | 8.31H $\delta$ 2;<br>7.08 H $\epsilon$ 1                                                                                    |
| Pro <sup>13</sup> | ---  | 4.26                      | 2.15; 1.87                   | 3.60 $\delta$ ; 3.42 $\delta'$                                                                                              |
| Gly <sup>14</sup> | 8.46 | 3.90 $\alpha\alpha'$      |                              |                                                                                                                             |
| Gly <sup>15</sup> | 8.18 | 3.94 $\alpha\alpha'$      |                              |                                                                                                                             |
| Ser <sup>16</sup> | 8.24 | 4.34                      | 3.71 $\beta\beta'$           |                                                                                                                             |
| Asn <sup>17</sup> | 8.36 | 4.62                      | 2.67; 2.60                   | 7.41 H $\delta$ 21; 6.77<br>H $\delta$ 22                                                                                   |
| Trp <sup>18</sup> | 7.99 | 4.53                      | 3.18 $\beta\beta'$           | 7.14 H $\delta$ 1<br>10.05 H $\epsilon$ 1<br>7.39 H $\zeta$ 2<br>7.06 H $\eta$ 2<br>7.37 H $\zeta$ 3<br>7.48 H $\epsilon$ 3 |
| Gly <sup>19</sup> | 8.13 | 3.67-3.74 $\alpha\alpha'$ |                              |                                                                                                                             |
| Gln <sup>20</sup> | 7.93 | 4.19                      | 2.23-2.04-1.84               | 7.52; 7.03 NH <sub>2</sub> t<br>7.42 H $\epsilon$ 22;<br>6.79 H $\epsilon$ 21                                               |

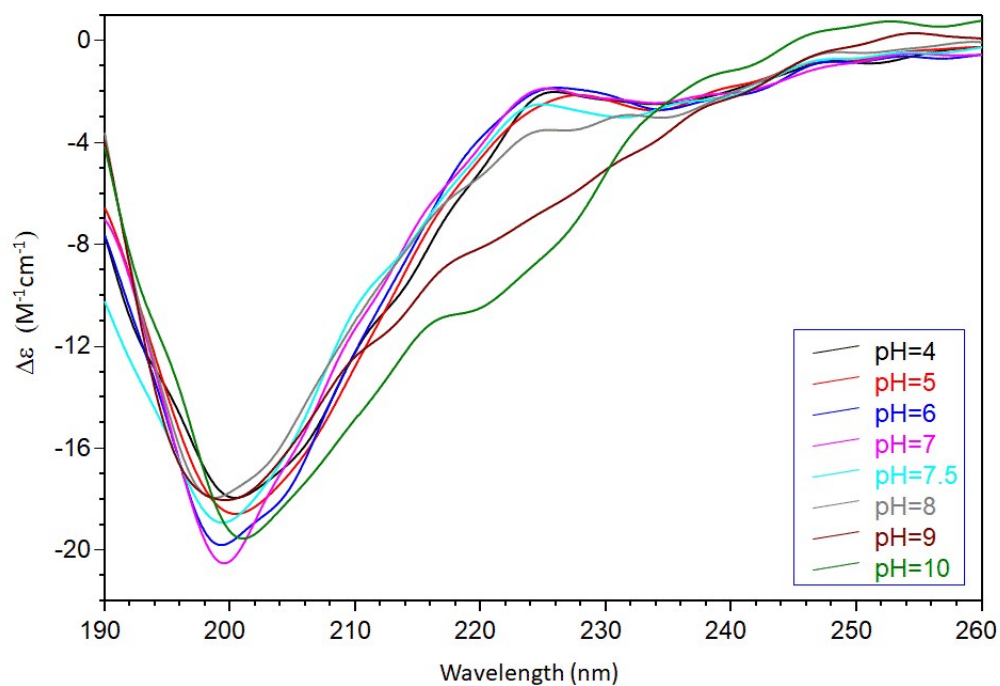

**Figure S1.** Far UV CD spectra of Cu(II)-Op\_bis-deca in H<sub>2</sub>O 2:1 metal to ligand molar ratio, [L]= 1 x 10<sup>-5</sup> M at different pH values.

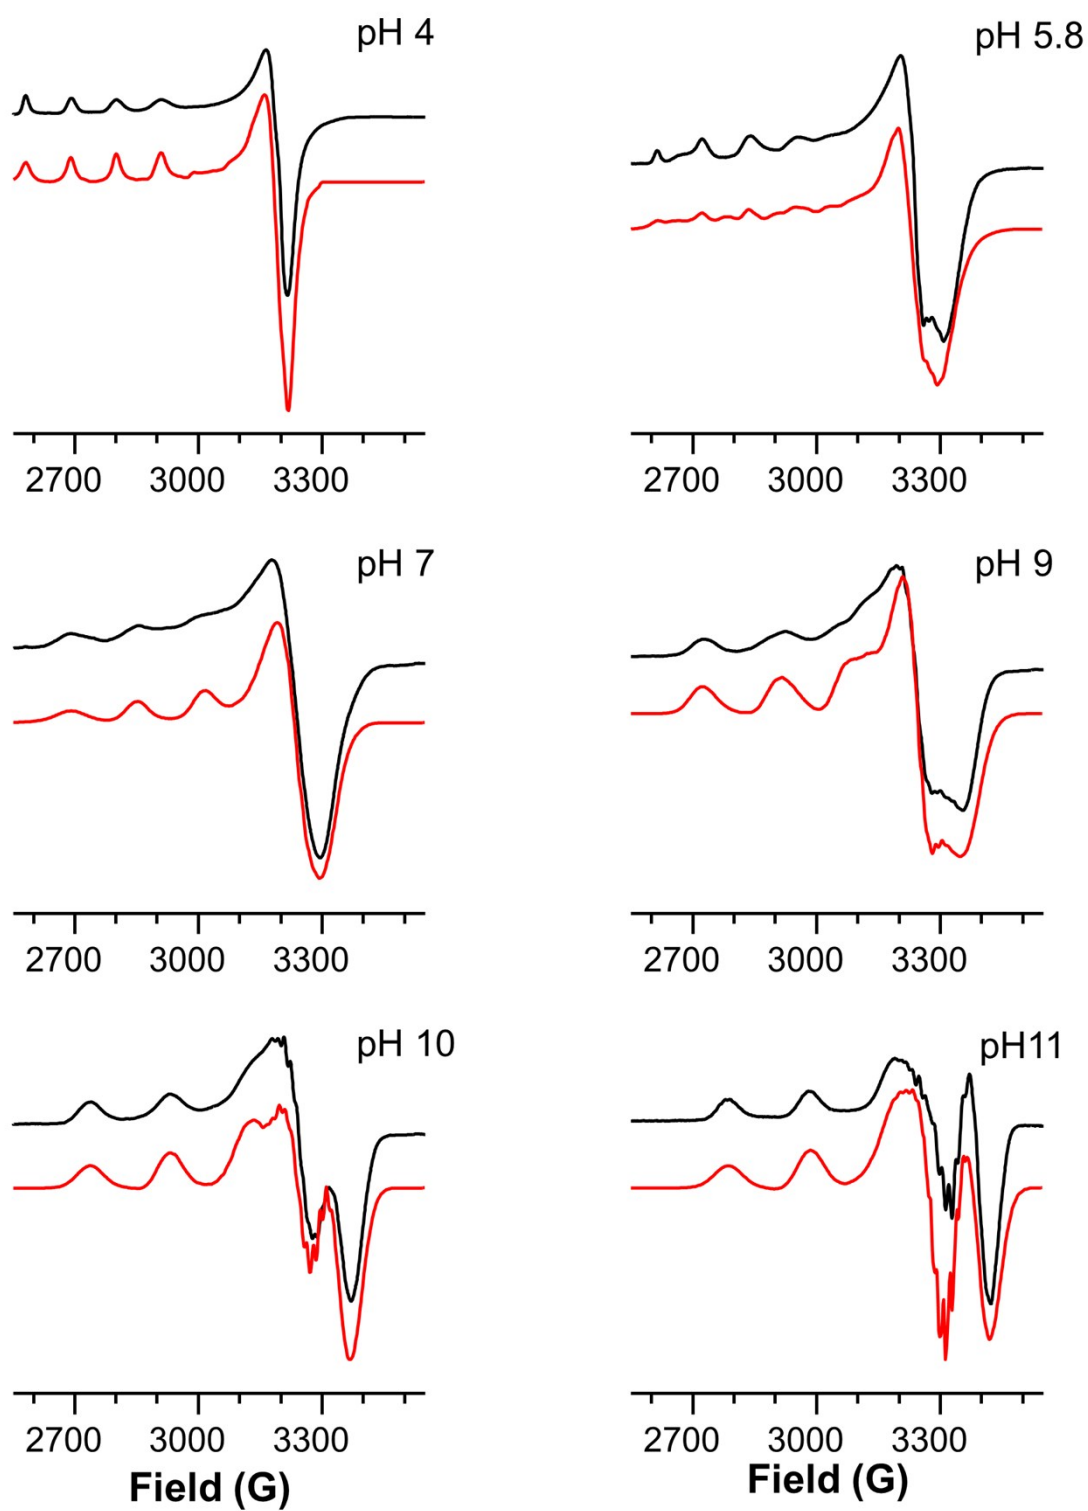

**Figure S2.** Experimental (black traces) and simulated (red traces) EPR spectra of Cu(II)-Op\_bis-deca peptide at Cu(II): L 1:1 molar ratio at different pH values. T= 150 K, [L]=[Cu(II)] =  $1 \times 10^{-3}$  M.

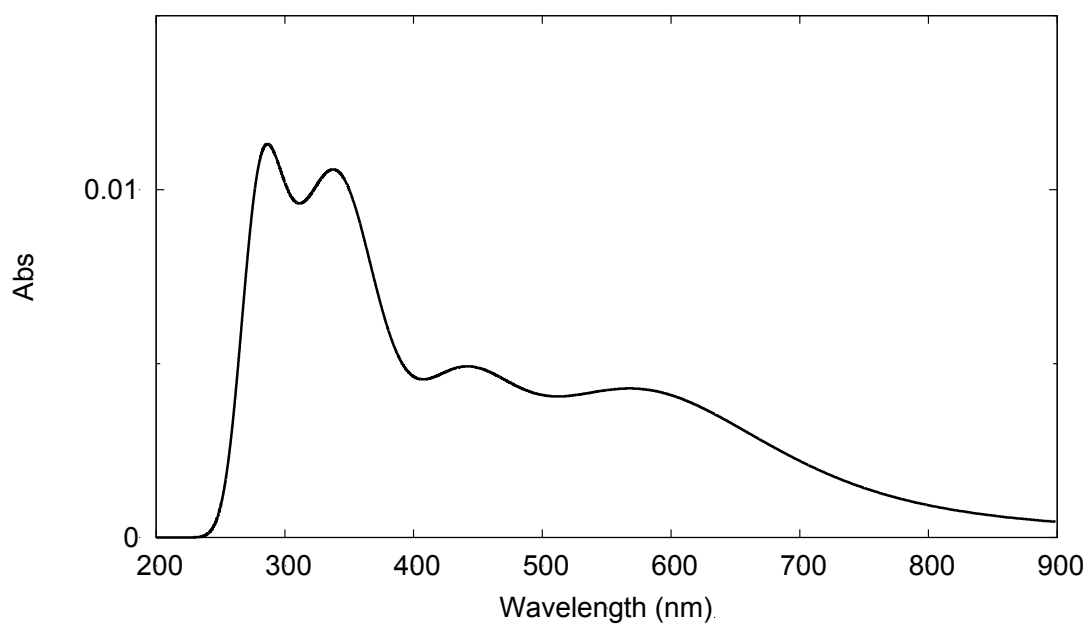

Figure S3. Predicted UV spectrum at the PBE/6-31G\* level including the PCM model for the copper(II) coordinated within the <sup>2</sup>HPGG<sup>5</sup> fragment of Op\_bis-deca peptide.

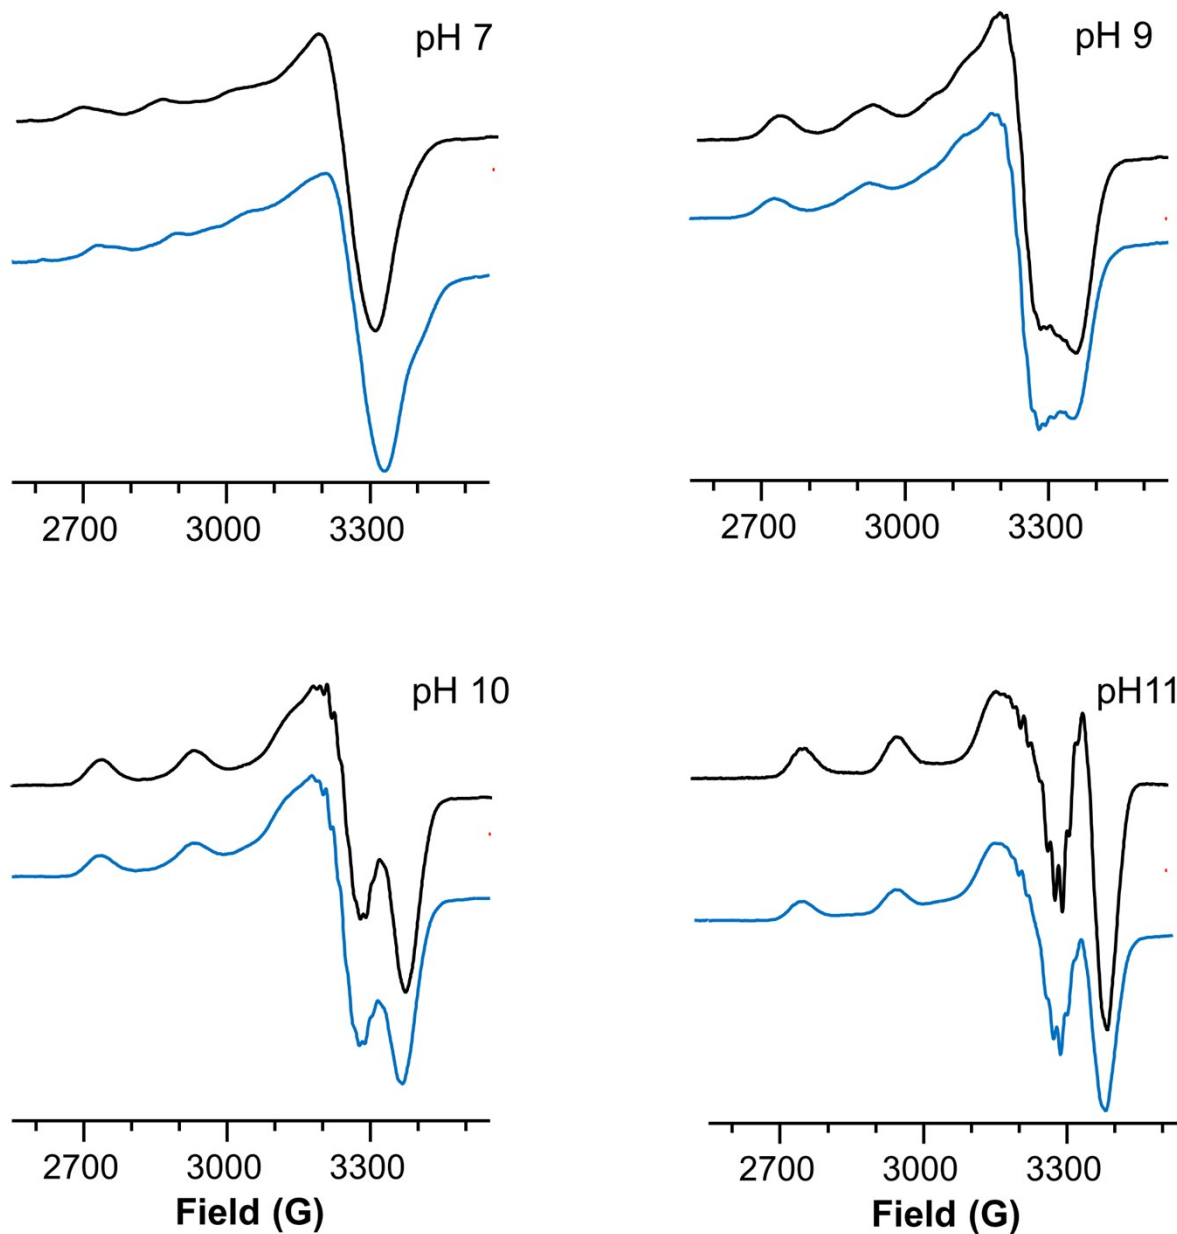

**Figure S4.** Comparison of EPR spectra of Cu(II)-Op\_bis-deca peptide at Cu(II): L 1:1 molar ratio (black traces) with those obtained at Cu(II): L 2:1 molar ratio (blue traces), at different pH values.  $T = 150 \text{ K}$ ,  $[L] = 1 \times 10^{-3} \text{ M}$ .

**Table S2.** Coordination parameters for Cu(II) coordinated to Op\_bis-deca peptide. Root mean square displacement during geometry optimization is  $10^{-3}$  Å.

| Bond                              | Bond length (Å) | Angle type                                        | Angle (degrees) |
|-----------------------------------|-----------------|---------------------------------------------------|-----------------|
| Cu <sup>2+</sup> -O               | 2.06            | N <sub>im</sub> -Cu <sup>2+</sup> -N <sup>-</sup> | 97.63           |
| Cu <sup>2+</sup> -N <sub>im</sub> | 1.97            | N <sub>im</sub> -Cu <sup>2+</sup> -O              | 84.12           |
| Cu <sup>2+</sup> -N <sup>-</sup>  | 1.91            | O-Cu <sup>2+</sup> -N <sup>-</sup>                | 96.05           |
| Cu <sup>2+</sup> -N <sup>-</sup>  | 1.93            | N <sup>-</sup> -Cu <sup>2+</sup> -N <sup>-</sup>  | 86.44           |

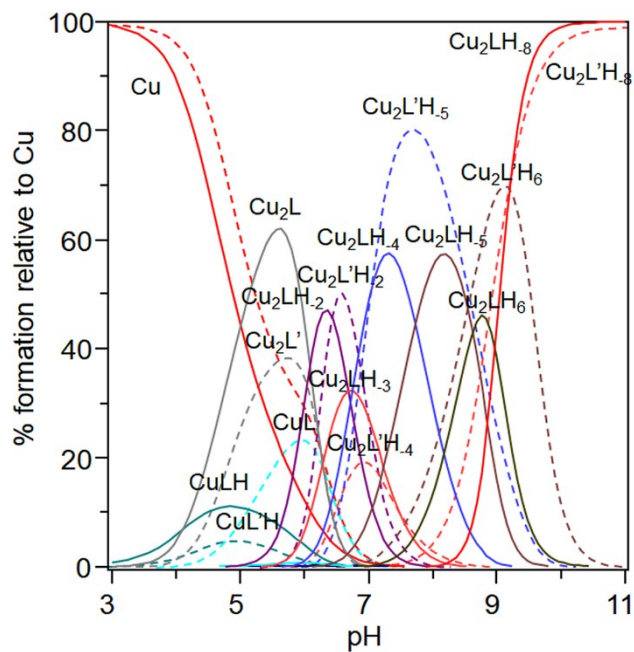

**Figure S4.** Species distribution diagrams for Cu(II) complexes with L= Op\_bis-deca (solid trace) and L'= Hu\_bis-octa (dashed trace), 2:1 metal to ligand molar ratio.  $[L]=[L']= 1 \times 10^{-3}$  M.



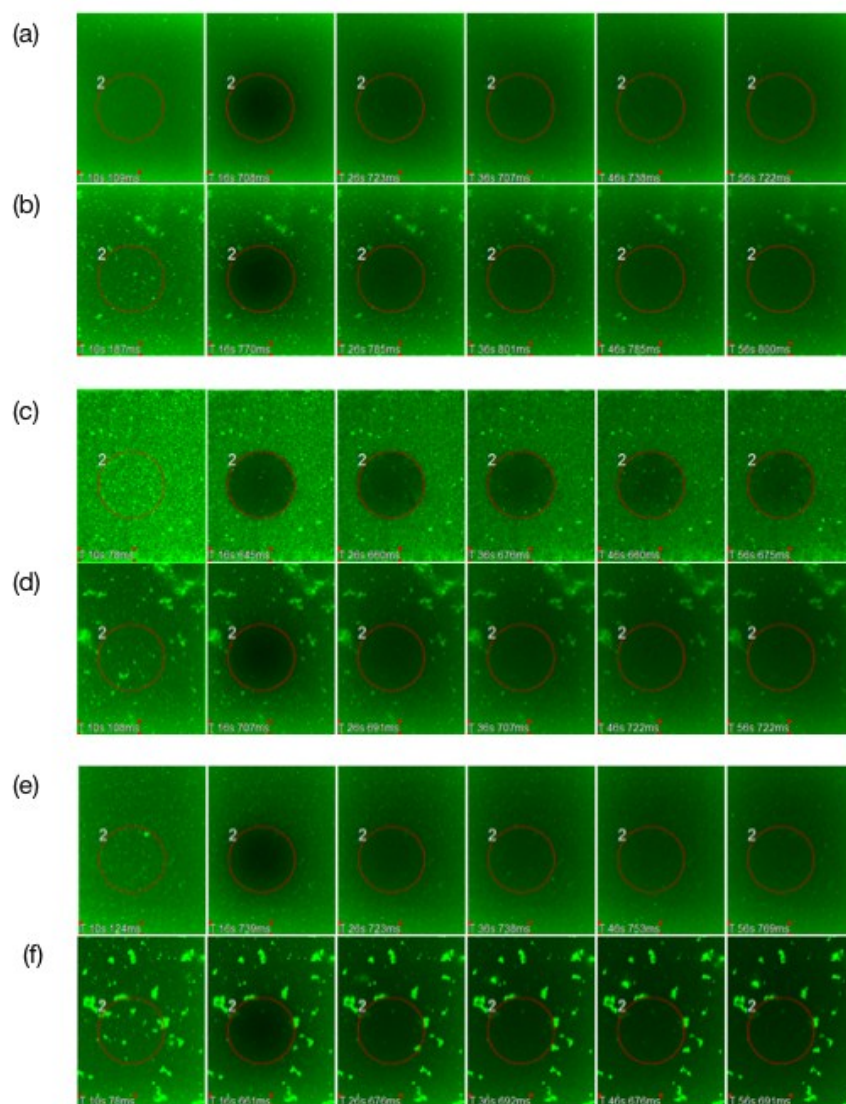

**Figure S5.** Representative LSM images for the FRAP experiment of SLB made of POPC–NBD formed on glass surfaces and exposed for 30 min to 1 mM peptide solutions. Micrographs recorded before and after bleach at intervals of 5 s. (a) Control bare SLBs; (b) SLB+ 1 mM CuSO<sub>4</sub>; (b) SLB+ 1 mM CuSO<sub>4</sub>; (c) SLB+ Op\_bis-deca; (d) SLB+ Hu\_bis-deca: CuSO<sub>4</sub> (1:1); (e) SLB+ Hu\_bis-octa; (f) SLB+ Op\_bis-deca: CuSO<sub>4</sub> (1:1).
